# Supplementary material
Source: PubMed Central journal article supplement (PMC6625655)

Figure S4

**A**

|                                                                | 1-Cell    | 2-Cell    | 4-Cell      | 8-Cell      | Morula      | ESC          |
|----------------------------------------------------------------|-----------|-----------|-------------|-------------|-------------|--------------|
| Total number of genes harboring promoter DHSs                  | 793       | 841       | 2,322       | 5,896       | 8,110       | 9,845        |
| Expressed at the indicated stage (FPKM>=1)                     | 623 (79%) | 719 (85%) | 1,873 (81%) | 4,282 (73%) | 5,814 (72%) | 7,643 (78%)  |
| Not expressed at neither the indicated stage or the next stage | 92 (12%)  | 103 (12%) | 384 (17%)   | 1,252 (21%) | 1,649 (20%) | 2,202 (22%)  |
| Expressed in the next stage (Primed state)                     | 78 (10%)  | 19 (2%)   | 65 (3%)     | 362 (6%)    | 647 (8%)    | Not analyzed |

**B**

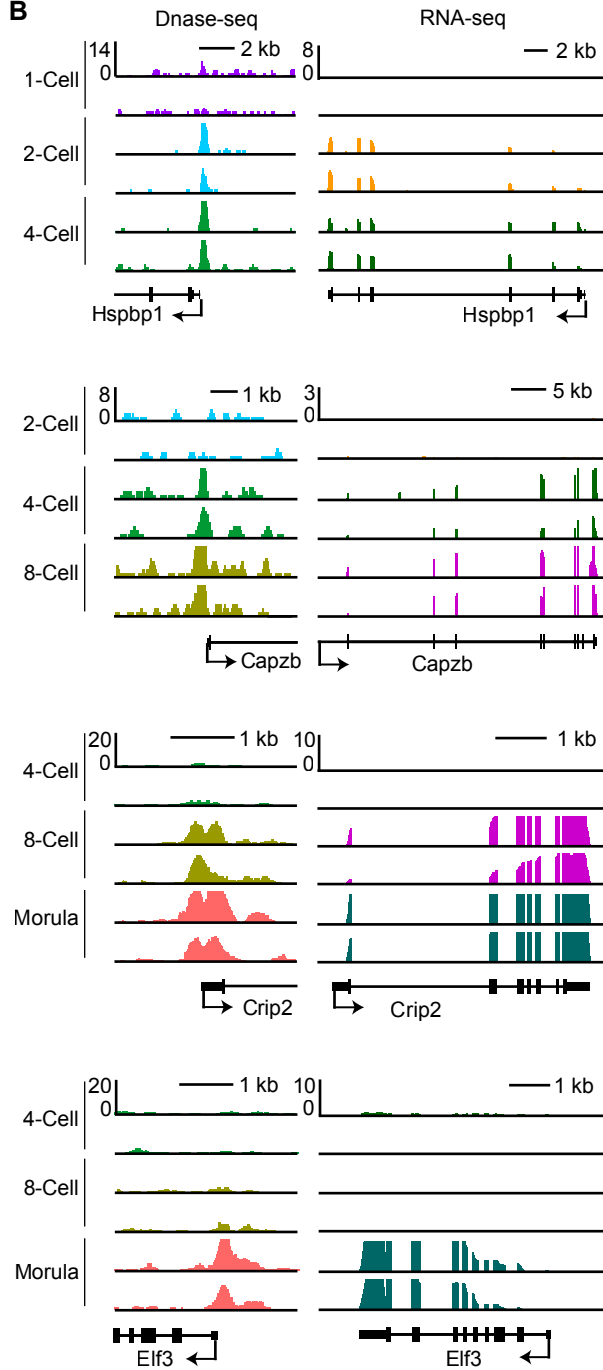

**C**

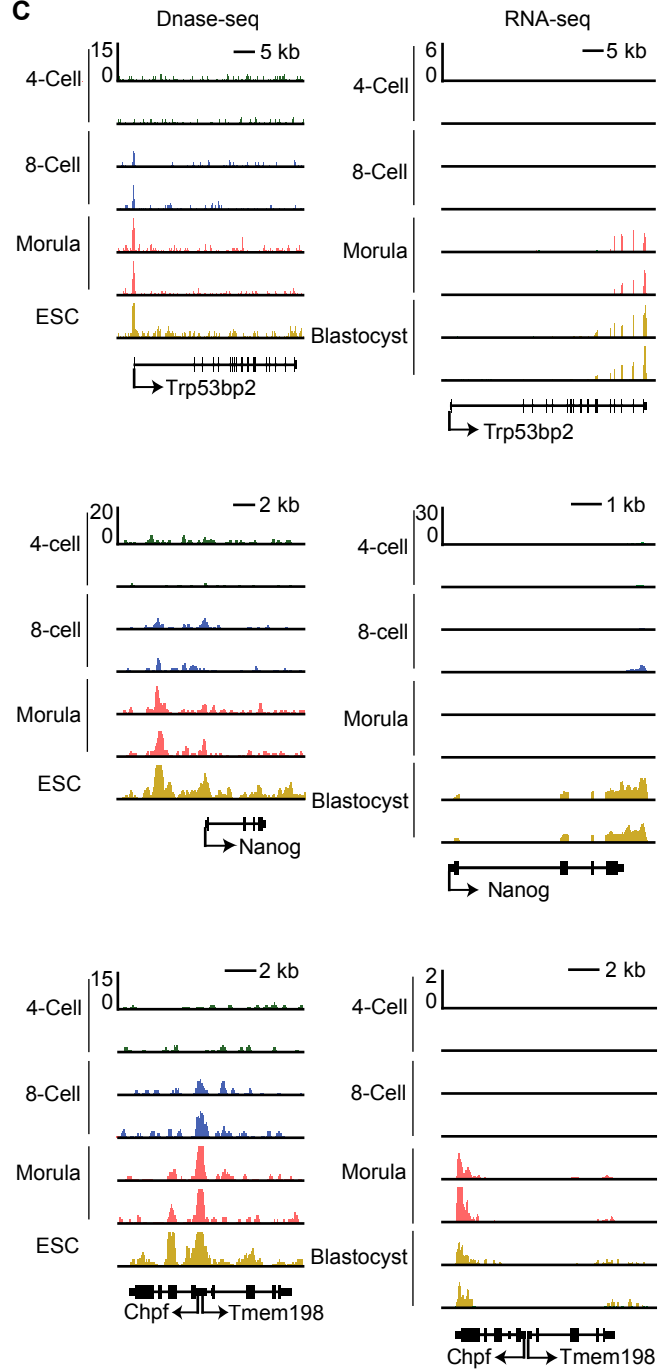

Supplement: NIHMS1533688-supplement-4.pdf [file NIHMS1533688-supplement-4.pdf]
